# Supplementary material for: Lot variation and inter-device differences contribute to poor analytical performance of the DCA Vantage™ HbA1c POCT instrument in a true clinical setting
Source: publisher site journal article supplement (doi:10.1515/cclm-2021-0720), 2021-09-04
Supplement: Supplementary file 1 [file j_cclm-2021-0720_suppl_002.docx]

**Lot variation and inter-device differences contribute to poor analytical performance of the DCA VantageTM HbA1c POCT instrument in a true clinical setting**

Short title: Analytical performance of the DCA VantageTM HbA1c analysis

Abildgaard, Anders (1,2) *

Knudsen, Cindy Søndersø (3)

Bjerg, Lise Nørkjær (4)

Lund, Sten (2)

Støy, Julie (2)

1) Department of Clinical Biochemistry, Regional Hospital Horsens, 8700 Horsens, Denmark

2) Steno Diabetes Center Aarhus, Aarhus University Hospital, 8200 Aarhus N, Denmark

3) Department of Clinical Biochemistry, Aarhus University Hospital, 8200 Aarhus N, Denmark

4) Department of Clinical Biochemistry, Regional Hospital Central Jutland, 8800 Viborg, Denmark

* ) corresponding author:

MD, PhD Anders Abildgaard at [anders@dadlnet.dk](mailto:anders@dadlnet.dk)

Department of Clinical Biochemistry, Regional Hospital Horsens, Sundvej 30, 8700 Horsens, Denmark.

**Abstract**

Objectives: The glycated haemoglobin fraction A1c (HbA1c) is widely used in the management of diabetes mellitus, and the Siemens DCA VantageTM point-of-care testing (POCT) instrument offers rapid HbA1c results even far from a clinical laboratory. However, the analytical performance has been questioned, and not much is known about effects of changing reagent lot, instrument and operator. We therefore compared the analytical performance of the DCA VantageTM with established routine methods (Tosoh G8/G11 ion exchange HPLC) in a true clinical setting at two Danish hospitals.

Methods: We extracted all routine clinical HbA1c results incidentally drawn from the same patient within 48 hours (n=960 pairs) and evaluated the effect of reagent lot, operator and instrument. We also performed a prospective method comparison in our diabetes out-patient clinic (n=97).

Results: The critical difference between two POCT results was 5.14–6.61 mmol/mol (0.47–0.55%), and the analytical imprecision of the DCA VantageTM (CVA) was >3%. Significant effect of reagent lot and inter-instrument differences were found, whereas no effect of operator was seen.

Conclusions: The DCA VantageTM HbA1c analysis does not fulfil the prevailing analytical performance specifications, but rigorous validation of new reagent lots and continuous recalibration of instruments may potentially improve the precision substantially. Our findings, therefore, clearly emphasize the necessity of a close collaboration between clinicians and laboratory professionals in the POCT field. Finally, POCT HbA1c results should always be interpreted together with other measures of glycaemic control to avoid revaluation of patient treatments based on measurement uncertainty.

Keywords:

Glycated Hemoglobin A

Point-of-Care testing

Clinical Laboratory Techniques

# Introduction

The glycated hemoglobin fraction A1c (HbA1c) is a pivotal blood test in the diagnosis and monitoring of patients with diabetes mellitus. A diagnosis of diabetes can be made when HbA1c exceeds 48 mmol/mol (Diabetes Control and Complications Trial (DCCT) units: 6.5%)[1], and adjustment of anti-diabetic treatment based on regular assessment of HbA1c reduces the risk of diabetic complications [2]. Today, the HbA1c analysis is highly standardised owing to the International Federation of Clinical Chemistry (IFCC) [3], and excellent routine laboratory methods with high analytical performance are widely available at most clinical chemistry departments [4]. Commonly, a blood sample for the HbA1c analysis has to be drawn before the medical appointment. Consequently, patients often have to attend their health care centre twice, and this circumstance may be particularly troublesome for patients with socioeconomic challenges or for patients residing in rural areas with large distances to the blood sampling facility [5, 6]. Point-of-care testing (POCT) is an alternative to analyses performed at a central laboratory. Several POCT devices for the measurement of HbA1c exist [7], and typically, a HbA1c test result is available within a few minutes from a small capillary blood sample. Hence, the test may be carried out locally immediately before or during the medical appointment. Unfortunately, concerns have been raised as to the analytical performance of the POCT devices. In fact, it has been reported that several instruments do not fulfil the required analytical specifications [8, 9]. Importantly, imprecise measurements may cause undue changes in anti-diabetic therapy with the risk of over- or undertreatment as well as misclassification of disease [10].

The DCA VantageTM (Siemens Healthineers, Erlangen, Germany) instrument is a frequently used POCT device for HbA1c measurements. According to a recent meta-analysis by Hirst et al. [11], more than 30 studies have previously evaluated the analytical performance of the instrument since 1993. Interestingly, the authors noted a great variation in reported mean bias between the included studies of -10–3.1 mmol/mol (-0.96–0.28%), and within individual studies, the differences between DCA VantageTM and the comparator method typically extended over a range of 10.9–16.4 mmol/mol (1.0–1.5%). Such unexplained variation may represent a high analytical imprecision, but unfortunately, no studies have examined and identified the most important contributing factors, including different instrument operators, inter-instrument differences or reagent lot variation. Also, the majority of studies on POCT devices were performed in a laboratory setting by laboratory personnel and not in a true clinical setting with clinical end-users [11].

In the present study, we therefore evaluated the “real life” analytical performance of the DCA VantageTM POCT HbA1c analysis in comparison with well-established laboratory ion exchange HPLC methods 1) by use of a data extract of routine clinical chemistry data and 2) by a prospective method comparison. Furthermore, we evaluated the effect of changing reagent lots, POCT instruments and operators. The POCT analyses were performed in a true clinical setting at the diabetes out-patient clinic at two different Danish hospitals.

# Materials and methods

## Laboratory data extract

Pairs of routine HbA1c analyses performed on blood samples from the same patients drawn within 48 hours from January 2019 to February 2021 were extracted from the laboratory information system. It was assumed that within-pair differences mainly represented measurement uncertainty with no intra-individual biological variation (CVI ≈ 0), and a data extract confirmed stability of HbA1c during 48 hours (Supplemental Figure 1). The laboratory information system of the Central Denmark Region contains laboratory tests requested by all hospitals and general practitioners in the region, which has a population of approx. 1.3 million. Data from two hospitals, Aarhus University Hospital (AUH) and Regional Hospital Central Jutland (RHCJ), were utilised. Specifically, two extracts were made; one extract contained pairs of HbA1c samples both analysed at the central laboratory within 48 hours, whereas in the second extract, HbA1c measurements performed with a local POCT device were paired with a HbA1c result from the central laboratory within 48 hours, if available. Paired HbA1c from the same patient with a relative difference >20% were excluded due to a high risk of analytical interference caused by e.g. haemoglobin variants (n=12).

## Prospective method comparison

Diabetes patients having an appointment with the diabetes out-patient clinic at the Steno Diabetes Center Aarhus, AUH, were prospectively recruited in the period March 1st–April 23rd 2021 if they had a blood sample drawn for a laboratory HbA1c measurement within 24 hours prior to their appointment. In such cases, a supplementary POCT HbA1c measurement was performed immediately before the appointment. The study was approved as a quality assurance project by the hospital management, and no ethical approval was needed according to relevant national regulations and institutional policies.

## Biochemical analyses

Laboratory HbA1c analyses were performed with one random out of three Tosoh G8 ion exchange HPLC analysers (Tosoh Bioscience, Tokyo, Japan) at the Department of Clinical Biochemistry, AUH, or with one random out of two Tosoh G11 ion exchange HPLC analysers (Tosoh Bioscience, Tokyo, Japan) at the Department of Clinical Biochemistry, RHCJ. Only EDTA-anticoagulated whole blood was used.

POCT HbA1c analyses were performed with a random out of four DCA VantageTM instruments (Siemens Healthineers, Erlangen, Germany) located at the diabetes out-patient clinics (Steno Diabetes Center and Department of Paediatrics) at AUH. At the RHCJ, ten similar POCT devices were used, and the instruments were placed locally in the out-patient clinics. Capillary blood samples for the POCT analysis were collected and analysed by trained clinical personnel. POCT results were automatically transferred to the laboratory information system. Reagent lot number, instrument and operator were registered for each test.

The laboratory and POCT methods were traceable to the IFCC Reference Method. Both laboratories were accredited according to ISO15189:2013 and ISO22870:2016 and participated in an external quality assurance scheme for HbA1c for the laboratory as well as for the POCT method (2 samples/round, 6 rounds/year).

## Statistical analyses

All HbA1c values are reported on the IFCC scale (mmol/mol) with DCCT units in brackets. The critical difference (CD), also known as the reference change value, is the smallest difference between sequential laboratory results which is associated with a true change in the patient with a probability of 95% [12]. In the present study, the CD between two laboratory results (CDLAB) and the CD between a laboratory and a POCT result (CDLAB-POCT) were derived from the 2.5th and 97.5th percentiles of within-pair differences as “(97.5th - 2.5th percentile) x 0.5” at a HbA1c level of 48 mmol/mol (including lab results >43–53 mmol/mol) and 58 mmol/mol (including lab results >53–63 mmol/mol).

The analytical coefficient of variation for the laboratory analysis (CVA(LAB)) was estimated based on CDLAB as “CVA(LAB)= (CDLAB/1.96/SQRT(2))” (derived from [12], CVI=0%). Similarly, the analytical coefficient of variation for the POCT analysis (CVA(POCT)) was estimated as “CVA(POCT)= SQRT((CDLAB-POCT/1.96)2 - CVA(LAB)2)”. The critical difference between two POCT results (CDPOCT) was calculated as “CDPOCT= 1.96 x SQRT(2) x CVA(POCT)”. As an alternative approach, CVA was calculated based on the within-pair difference by use of the Dahlberg formula [13] as “CVA= SQRT((Σi=1, N within-pair difference2)/2/N)/mean HbA1c x 100%”. CVA(POCT) was then calculated as “CVA(POCT)= SQRT(2 x CVA(LAB-POCT)2 - CVA(LAB)2)”

POCT lot-correction was performed by subtraction of the median relative difference observed for the respective lot from the within-pair relative difference of all pairs analysed with the similar lot. A similar procedure was used in analysis of operator and instrument effects. Differences between lot numbers, operators and instruments were statistically tested with Kruskal-Wallis test. Only groups with at least 10 observations were included in the tests.

Since POCT reagent lots are used in a limited time period, the observed lot effect could be partly confounded by a changing bias of the laboratory method over time. Therefore, we also adjusted the monthly relative difference between POCT and laboratory measurements for the bias of AUH relative to the four other hospitals of the Central Denmark Region.

# Results

## Retrospective laboratory data

At AUH, 1,495 pairs of HbA1c samples drawn from the same patient within 48 hours were identified from 1,357 unique patients (Supplemental Figure 2A). For POCT HbA1c, 652 measurements could be paired with a laboratory analysis performed within 48 hours (Supplemental Figure 3A). At RHCJ, 1,080 HbA1c paired laboratory measurements from 1,039 patients were identified (Supplemental Figure 2B), and 308 pairs of POCT and laboratory HbA1c results were found (Supplemental Figure 3B). At both hospitals, the median time difference between laboratory and POCT samples was 1 hour. The median time between paired laboratory samples was 24 hours at AUH and 22 hours at RHCJ. The estimated CD and CVA as well as the calculated CVA are presented in Table 1.

POCT measurements had a negative relative bias of -2.00% at 48 mmol/mol (6.5%) and -1.79% at 58 mmol/mol (7.5%) compared with the central laboratory at AUH. Conversely, at RHCJ, no bias was seen (Table 1).

## Prospective data

Over-all, 97 patients with a laboratory HbA1c measurement performed <24 hours before their appointment at the Steno Diabetes Center Aarhus were recruited, and an additional POCT HbA1c value was obtained (Figure 1). Ninety-six of the samples were obtained within 3 hours from the laboratory samples. The laboratory HbA1c range was 35–105 mmol/mol (5.4–11.8%), and the median relative difference between POCT and laboratory was -2.44%. In the clinically most relevant range from 43–63 mmol/mol (6.1–7.9%) (n=58), a CVA of the POCT analysis was estimated to be 3.22% based on the observed CD and calculated to be 4.27%.

## Lot number, operator and instrument effects

Our data extract included POCT measurements analysed with 25 different reagent lots at AUH and 3 different reagent lots at RHCJ. At AUH, 19 lots were utilised at least 10 times in the data set. The median relative difference between POCT and laboratory values varied significantly with the reagent lot at AUH (p<0.0001) and at RHCJ (p=0.0007) (Figure 2). At AUH, adjustment for lot resulted in a substantial reduction in CVA and CD (Table 2). At RHCJ, 86% of the measurements were made with two lots that showed no median relative difference relative to the laboratory results. Consequently, CVA and CD remained largely unaffected after lot adjustment at RHCJ (Table 2).

We also adjusted the difference between POCT and LAB measurements for the bias of the laboratory at AUH relative to the four other hospitals of the Central Denmark Region calculated for each month. In total, 341 measurements from AUH could be paired with another HbA1c sample from the same patient analysed at another hospital within 48 hours. On average, AUH had a small positive bias of 2.13%. However, the lot effect remained unaltered after correction, although it was slightly positively shifted.

We identified 16 different operators who had performed at least ten POCT measurements each. The median relative difference between POCT and laboratory values differed from -3.57% to 0.00% between operators, but the difference was not statistically significant (p=0.23). Lot-adjustment did not affect the size of the operator effect.

At RHCJ, significant inter-instrument effect was found (p<0.0001)(Figure 3), and correction for instrument reduced the estimated CVA and CD substantially (Table 2). No difference between three instruments at AUH was evident (p=0.47).

# Discussion

In the present study, we evaluated the analytical performance of the Siemens DCA VantageTM HbA1c POCT analysis in a true clinical setting in comparison with well-established clinical laboratory methods (Tosoh G8/G11 ion exchange HPLC) by use of routine patient data extracts as well as by a prospective method comparison. Over-all, we found that the POCT analysis had substantially higher CVA and CD compared with the laboratory methods, and significant POCT reagent lot effect and inter-instrument differences were seen, whereas no effect of operator was evident.

A CD as high as 6.61 mmol/mol (0.6%) was seen for the POCT analysis at clinically relevant HbA1c levels. In clinical practice, a change in HbA1c of at least 5 mmol/mol (0.46%) between two consecutive samples from the same patient should lead to revaluation of treatment [14], and such change may, consequently, be considered a clinical decision limit. Furthermore, a difference of 5-6 mmol/mol (0.46–0.55%) separates principally healthy persons with high diabetes risk from the diagnostic cut-off for diabetes (48 mmol/mol (6.5%))[15]. In comparison, the laboratory methods showed a CD as low as approx. 2 mmol/mol (0.18%) at 48 mmol/mol (6.5%). Similarly, we found that both the estimated and calculated CVA exceeded the prevailing quality requirements recommended by the Danish Scientific Committee on Quality Assurance (VUK) (<2.8%) and by the Executive Committee of the American Diabetes Association (ADA) (<3%)[16, 17]. Our estimates of CVA are comparable with previous reports [11, 18] and confirm the conjecture that most POCT analyses are analytically inferior to clinical laboratory methods. Uniquely, however, our estimates of imprecision and CD were not based on repeated measures of non-commutable QC material, but were derived directly from routine patient results in a true clinical setting. Consequently, they are more likely to resemble the true measurement uncertainty that should be expected by clinicians.

Previously, lot-to-lot variation of the DCA VantageTM instrument has been suggested [9, 19], but no studies have examined the issue thoroughly and quantified its contribution to the over-all analytical error. We found that the CVA at 48 mmol/mol (6.5%) was reduced to 2.65% at AUH after lot adjustment. Intriguingly, such an imprecision is just within the quality requirements. POCT reagent lot variation is a well-known issue [19-22], and validation of new reagent lots is generally recommended by the Clinical & Laboratory Standards Institute (CLSI)[23]. Paradoxically, the intended end-users of POCT instruments commonly include clinical personnel with limited laboratory training, and this notion emphasizes the importance of strong collaborations between clinical end-users and laboratory professionals and the implementation of regional and institutional committees to ensure POCT quality assurance. Although being expensive and time consuming, meticulous lot validation apparently has the potential to improve the analytical performance of the DCA VantageTM substantially.

Lastly, we also evaluated differences between instruments and effects of the operator. As the analytical reaction essentially takes place in the test cartridge, it may come as a surprise that a substantial instrument effect was found at the RHCJ. Indeed, such findings call for continuous recalibration of instruments. Conversely, no effect of operator was seen. In fact, it has been reported that user competency may affect POCT results substantially [24]. In our present settings, the instruments could only be operated by trained clinical staff, and registration of operator ID was mandatory before each measurement. It is possible that such precautions served to minimise any potential operator effects in our settings.

Our present results should lead to considerations on the use of POCT HbA1c in the clinical management of diabetes. Since POCT HbA1c instruments often don’t comply with analytical requirements, such methods should not be the only way of monitoring diabetes, and treatment decisions should never be made entirely on the basis of POCT results. It may be argued that a POCT result should only be requested in situations where no laboratory HbA1c is attainable, including in the management of vulnerable patients frequently staying away from clinical and laboratory appointments. Indeed, a POCT HbA1c is better than no HbA1c result. Alternatively, POCT HbA1c results may be combined with other ways of assessing glycaemic control, including frequent blood glucose measurements at home or data from increasingly utilised technologies such as continuous/flash glucose monitors. Unfortunately, no clinical studies have examined the usefulness of such combinations, and the exact role of POCT HbA1c evaluations is not considered in the current clinical guidelines[25]. Consequently, we encourage institutions to implement such recommendations in their local clinical guidelines. Definitely, clinicians should be aware that a laboratory and POCT HbA1c result cannot be interpreted in the same way.

Although we estimated the CD based on HbA1c results obtained in a true clinical setting, certain limitations relate to our approach. Firstly, our estimated CVA was not obtained as described in established guidelines for within-laboratory precision experiments [26]. It did include some sources of intermediate variation, including different instruments and operators, but all samples were run within 48 hours. Typically, within-laboratory precision (intermediate precision) is assessed over 20 days [26]. Conversely, it included pre-analytical errors and random patient-specific interferences, and it was performed with fully commutable samples. Therefore, our estimated CVA more likely resembles the true measurement uncertainty. Secondly, the estimated CVA of the POCT analysis included additional sources of variation compared with the laboratory CVA, such as recalibration uncertainty of the laboratory method and variation caused by different matrices (venous vs. capillary blood). However, adjustment for the bias of AUH relative to the remaining hospitals on a monthly basis did not reduce the imprecision, and matrix differences between venous and capillary blood have been shown not to affect HbA1c results from the DCA VantageTM [27]. Finally, our study mainly relied on retrospective data. Nevertheless, our prospective comparison confirmed the over-all conclusion that the DCA VantageTM HbA1c method does not comply with recommendations for analytical performance.

In conclusion, the use of the DCA VantageTM HbA1c POCT analysis in a true clinical setting revealed a CD between two POCT results that may exceed 6 mmol/mol (0.55%). However, the analytical error is likely to be reduced substantially through rigorous validation of new reagent lots and continuous recalibration of individual instruments. On the other hand, no effect of instrument operator was evident. Our findings clearly emphasize the necessity of a close collaboration between clinicians and laboratory professionals in the POCT field. Furthermore, we encourage all institutions to provide clinical guidelines that include clear indications for the use of POCT HbA1c. Indeed, a POCT HbA1c result should as a general rule be combined with other measures of glycaemic control to avoid revaluation of patient treatments based on measurement uncertainty.

**References**

1. International Expert Committee. International Expert Committee report on the role of the A1C assay in the diagnosis of diabetes*.* Diabetes Care 2009;32:1327-34.

2. Laiteerapong N, Ham SA, Gao Y, Moffet HH, Liu JY, Huang ES, et al. The Legacy Effect in Type 2 Diabetes: Impact of Early Glycemic Control on Future Complications (The Diabetes & Aging Study)*.* Diabetes Care 2019;42:416-426.

3. Jeppsson JO, Kobold U, Barr J, Finke A, Hoelzel W, Hoshino T, et al. Approved IFCC reference method for the measurement of HbA1c in human blood*.* Clin Chem Lab Med 2002;40:78-89.

4. Lenters-Westra E, English E. Understanding the Use of Sigma Metrics in Hemoglobin A1c Analysis*.* Clin Lab Med 2017;37:57-71.

5. Kristensen T, Waldorff FB, Nexoe J, Skovsgaard CV, Olsen KR. Variation in Point-of-Care Testing of HbA1c in Diabetes Care in General Practice*.* Int J Environ Res Public Health 2017;14.

6. Shephard M, O'Brien C, Burgoyne A, Croft J, Garlett T, Barancek K, et al. Review of the cultural safety of a national Indigenous point-of-care testing program for diabetes management*.* Aust J Prim Health 2016;22:368-374.

7. Whitley HP, Yong EV, Rasinen C. Selecting an A1C Point-of-Care Instrument*.* Diabetes Spectr 2015;28:201-8.

8. Lenters-Westra E, Slingerland RJ. Six of eight hemoglobin A1c point-of-care instruments do not meet the general accepted analytical performance criteria*.* Clin Chem 2010;56:44-52.

9. Lenters-Westra E, Slingerland RJ. Three of 7 hemoglobin A1c point-of-care instruments do not meet generally accepted analytical performance criteria*.* Clin Chem 2014;60:1062-72.

10. Nielsen AA, Petersen PH, Green A, Christensen C, Christensen H, Brandslund I. Changing from glucose to HbA1c for diabetes diagnosis: predictive values of one test and importance of analytical bias and imprecision*.* Clin Chem Lab Med 2014;52:1069-77.

11. Hirst JA, McLellan JH, Price CP, English E, Feakins BG, Stevens RJ, et al. Performance of point-of-care HbA1c test devices: implications for use in clinical practice - a systematic review and meta-analysis*.* Clin Chem Lab Med 2017;55:167-180.

12. Fraser CG. Reference change values*.* Clin Chem Lab Med 2011;50:807-12.

13. Kallner A, Theodorsson E. Repeatability imprecision from analysis of duplicates of patient samples and control materials*.* Scand J Clin Lab Invest 2020;80:210-214.

14. National Institute for Health and Care Excellence (NICE). Type 2 diabetes in adults: management (NG28). 2020 update*.* 2015.

15. American Diabetes Association (ADA). 2. Classification and Diagnosis of Diabetes: Standards of Medical Care in Diabetes-2021*.* Diabetes Care 2021;44:S15-S33.

16. Scientific Committee on Quality Assurance (VUK). Analysekvalitetskrav til HbA1c ved brug til diagnostik og monitorering af diabetes (Analytical Quality of HbA1c when used for diagnosis and monitoring of diabetes), 2011: <https://dskb.dk/wp-content/uploads/2020/11/VUK-HbA1c.pdf> Accessed on 15th Dec, 2020.

17. Sacks DB, Arnold M, Bakris GL, Bruns DE, Horvath AR, Kirkman MS, et al. Guidelines and recommendations for laboratory analysis in the diagnosis and management of diabetes mellitus*.* Diabetes Care 2011;34:e61-99.

18. Shephard M, Shephard A, McAteer B, Regnier T, Barancek K. Results from 15years of quality surveillance for a National Indigenous Point-of-Care Testing Program for diabetes*.* Clin Biochem 2017;50:1159-1163.

19. Lenters-Westra E, Slingerland RJ. Hemoglobin A1c point-of-care assays; a new world with a lot of consequences! J Diabetes Sci Technol 2009;3:418-23.

20. Trautsch M, Nickerson-Troy J, Moore R, Ingari E, Meretsky N, Lewis L, et al. Clinical effects of calibration of CoaguChek XS PT Test Strips on Anticoagulation Management Services*.* J Am Pharm Assoc (2003) 2020;60:72-75.

21. Stavelin A, Riksheim BO, Christensen NG, Sandberg S. The Importance of Reagent Lot Registration in External Quality Assurance/Proficiency Testing Schemes*.* Clin Chem 2016;62:708-15.

22. Kenealy T, Herd G, Musaad S, Wells S. HbA1c screening in the community: Lessons for safety and quality management of a point of care programme*.* Prim Care Diabetes 2019;13:170-175.

23. Clinical and Laboratory Standards Institute (CLSI). EP26-A - User Evaluation of Between-Reagent Lot Variation; Approved Guideline*.* 2013.

24. Huang Y, Campbell E, Colbourne B, Power J, Randell E. User competency is still a major factor affecting analytical performance of glucose meters in patient service*.* Clin Biochem 2019;63:66-71.

25. American Diabetes A. 6. Glycemic Targets: Standards of Medical Care in Diabetes-2021*.* Diabetes Care 2021;44:S73-S84.

26. Clinical and Laboratory Standards Institute (CLSI). EP05-A3 - Evaluation of Precision of Quantitative Measurement Procedures*.* 2014.

27. Weykamp C, John G, Gillery P, English E, Ji L, Lenters-Westra E, et al. Investigation of 2 models to set and evaluate quality targets for hb a1c: biological variation and sigma-metrics*.* Clin Chem 2015;61:752-9.

| **Aarhus University Hospital** | | | | |
| --- | --- | --- | --- | --- |
|  | **LAB** | | **POCT** | |
|  | **48 mmol/mol (6.5%)** | **58 mmol/mol (7.5%)** | **48 mmol/mol (6.5%)** | **58 mmol/mol (7.5%)** |
| **Observations (n)** | 276 | 131 | 181 | 197 |
| **CVA (estimated)** | 1.54% | 0.98% | 3.86% | 3.98% |
| **CVA (calculated)** | 1.73% | 1.28% | 4.30% | 4.67% |
| **Bias rel. to LAB** | - | - | -2.00% | -1.79% |
| **CD, mmol/mol IFCC (% DCCT)** | 2.04 mmol/mol (0.19%) | 2.64 mmol/mol (0.24%) | 5.14 mmol/mol (0.47%) | 6.40 mmol/mol (0.59%) |
| **Regional Hospital Central Jutland** | | | | |
|  | **LAB** | | **POCT** | |
|  | **48 mmol/mol (6.5%)** | **58 mmol/mol (7.5%)** | **48 mmol/mol (6.5%)** | **58 mmol/mol (7.5%)** |
| **Observations (n)** | 181 | 114 | 91 | 118 |
| **CVA (estimated)** | 1.22% | 0.75% | 4.31% | 4.11% |
| **CVA (calculated)** | 1.83% | 1.56% | 4.35% | 4.17% |
| **Bias rel. to LAB** | - | - | 0.00% | 0.00% |
| **CD, mmol/mol IFCC (% DCCT)** | 1.62 mmol/mol (0.15%) | 1.20 mmol/mol (0.11%) | 5.74 mmol/mol (0.53%) | 6.61 mmol/mol (0.60%) |

**Table 1: Analytical performance based on data extract**

Analytical performance based on data extracts of routine clinical chemistry results from the laboratory information system at two hospitals of the Central Denmark Region. Two laboratory HbA1c results or a laboratory and a POCT result from the same patient performed within 48 hours were paired, and the relative difference was calculated. CD and CVA (estimated) were derived from the 2.5th and 97.5th percentiles of the relative differences. Additionally, the CVA (calculated) was calculated from the difference between each measure pair by use of the Dahlberg formula.

CVA: analytical coefficient of variation; CD: critical difference at a 95% confidence limit; LAB: laboratory.

| **Aarhus University Hospital** | | | | | | |
| --- | --- | --- | --- | --- | --- | --- |
|  | **Lot-adjusted** | | **Operator-adjusted** | | **Instrument-adjusted** | |
|  | **48 mmol/mol (6.5%)** | **58 mmol/mol (7.5%)** | **48 mmol/mol (6.5%)** | **58 mmol/mol (7.5%)** | **48 mmol/mol (6.5%)** | **58 mmol/mol (7.5%)** |
| **CVA (est.)** | 2.65% | 3.75% | 3.89% | 4.03% | 3.89% | 4.07% |
| **CVA (calc.)** | 2.98% | 3.42% | 3.82% | 4.13% | 3.85% | 4.03% |
| **CD, mmol/mol IFCC (% DCCT)** | 3.53 mmol/mol (0.32%) | 6.04 mmol/mol (0.55%) | 5.17 mmol/mol (0.47%) | 6.47 mmol/mol (0.59%) | 5.17 mmol/mol (0.47%) | 6.54 mmol/mol (0.60%) |
| **Regional Hospital Central Jutland** | | | | | | |
|  | **Lot-adjusted** | | **Operator-adjusted** | | **Instrument-adjusted** | |
|  | **48 mmol/mol (6.5%)** | **58 mmol/mol (7.5%)** | **48 mmol/mol (6.5%)** | **58 mmol/mol (7.5%)** | **48 mmol/mol (6.5%)** | **58 mmol/mol (7.5%)** |
| **CVA (est.)** | 4.05% | 4.10% | NA | NA | 3.52% | 3.64% |
| **CVA (calc.)** | 4.28% | 4.06% | NA | NA | 3.93% | 3.76% |
| **CD, mmol/mol IFCC (% DCCT)** | 5.38 mmol/mol (0.49%) | 6.60 mmol/mol (0.60%) | NA | NA | 4.68 mmol/mol (0.43%) | 5.85 mmol/mol (0.54%) |

**Table 2: Adjusted analytical performance.**

Analytical performance based on routine clinical chemistry patient samples after adjustment for the POCT reagent lot, instrument operator or the POCT device. Adjustment was performed by subtraction of the median difference between POCT and laboratory results for each lot/operator/instrument from the difference between each sample pair. Non-adjusted values are presented in Table 1. CVA was estimated from the observed CD (est.) and also calculated from the difference between each pair (calc.) by use of the Dahlberg formula. No data on operator were available from the RHCJ.

CVA: analytical coefficient of variation; CD: critical difference at a 95% confidence limit.

**Figure 1: POCT vs. laboratory HbA1c based on prospective method comparison**

Method comparison between Siemens DCA VantageTM POCT and Tosoh G8 ion exchange HPLC. Diabetes patients (n=97) were prospectively recruited at the diabetes out-patient clinic at Aarhus University Hospital if they already had a laboratory HbA1c performed within the previous 24 hours. The difference ranged between -7–4 mmol/mol (-0.64–0.37%), and a median bias of -2 mmol/mol (-0.18%) was observed relative to the laboratory results.

**Figure 2: Reagent lot effect**

Relative difference (POCT vs. laboratory) between HbA1c sample pairs, each incidentally drawn from the same patient within 48 hours of each other. Measurement pairs are divided according to POCT reagent lot number. The thick lines represent medians. Differences reached statistically significance at AUH (p<0.0001) and at RHCJ (p=0.0007). Only reagent lots with at least 10 measurements are presented.

**Figure 3: Instrument effect**

Relative difference (POCT vs. laboratory) between HbA1c sample pairs, each incidentally drawn from the same patient within 48 hours of each other. Measurement pairs are divided according to POCT instrument used. The thick lines represent medians. Differences reached statistically significance at RHCJ (p<0.0001), but not at AUH (p=0.47). Only instruments with at least 10 measurements are presented.
